# Supplementary material for: Nicotine exposure of male mice produces behavioral impairment in multiple generations of descendants
Source: PLoS Biol. 2018 Oct 16;16(10):e2006497. doi: 10.1371/journal.pbio.2006497 (PMC6191076; doi:10.1371/journal.pbio.2006497)
Supplement: S5 Data — (XLSX) [file pbio.2006497.s009.xlsx]

## Sheet: S2_Fig Data
	S2_Fig A				S2_Fig B				S2_Fig C
		Water	Nicotine			Water	Nicotine			Water	Nicotine
		7620	6841			63.78	32.89			65.625	63.6364
		2906	5498			53.98	32.3			73.6842	60
		2130	7520			65.64	43.66			68	61.5385
		4624	5471			76.75	62.27			72.4138	51.5151
		4153	7684			71.49	57.71			59.0909	55.5556
		7523	10148			61.1	81			44.4444	57.5758
		17284	3144			76.9	63.6			87.5	47.3684
		9760	4026			41.7	50			64.2857	57.5758
			19048				62.5		MEAN	66.8805	56.8457
			10529				84.6		STD	12.3964	5.3325
			7940				57.1		SEM	4.38278	1.88532
	MEAN	7000	7986.27				50
	STD	4902.84	4120.6		MEAN	63.9175	56.4692
	SEM	1733.41	1189.51		STD	11.9155	16.2476
					SEM	4.21277	4.69026
